# Supplementary material
Source: publisher figshare collection journal article supplement (https://acs.figshare.com/ndownloader/files/7440736)
Supplement: Supplementary file 1 [file 7440736]

**Ultralow Percolation Threshold in**  
**Poly(L-lactide)/Poly(ε-caprolactone)/Multi-Wall Carbon Nanotubes Composites**  
**with a Segregated Electrically Conductive Network**

Yu-Dong Shi   Min Lei   Yi-Fu Chen   Kai Zhang   Jian-Bing Zeng   Ming Wang\*

Key Laboratory of Applied Chemistry of Chongqing Municipality, School of  
Chemistry and Chemical Engineering, Southwest University, Chongqing, 400715,  
China

**1. Thermodynamic and kinetic analysis for the localization of MWCNTs in the  
PLLA/PCL/MWCNTs composites**

The localization of MWCNTs in the PLLA/PCL/MWCNTs composites was first  
estimated by calculation of the wetting coefficient ( $\omega$ )

$$\omega = \frac{\gamma_{MWCNT-b} - \gamma_{MWCNT-a}}{\gamma_{ab}}$$

where  $\gamma_{MWCNT-a}$  and  $\gamma_{MWCNT-b}$  are the interfacial energy respectively between MWNTs  
and component  $a$ , between MWNTs and component  $b$ , respectively, and  $\gamma_{ab}$  is the  
interfacial tension between the two components. If the wetting coefficient is higher  
than 1, the filler will preferentially be located in component  $a$ ; if the wetting  
coefficient is lower than -1, the filler will preferentially be located in component  $b$ ,  
and if the wetting coefficient is between -1 and 1, the filler will be located at the  
interface between the two components.

In this work, the PLLA granules coated with PCL or PCLNT at 100 °C. Thus, it  
is necessary to extrapolate the surface energies towards the coating temperature. In

---

\*Corresponding Author  
E-mail address: [mwang@swu.edu.cn](mailto:mwang@swu.edu.cn) (M. Wang), Tel/Fax: 0086-023-68254000

order to obtain the high temperature data, the polymer polarity is assumed to be independent on the temperature. The surface parameter values (100 °C) of PLLA and PCL (see Table S1) were extrapolated from the experimental 25 °C values using the temperature coefficients of 0.06<sup>S1</sup> and 0.058<sup>S2</sup> mN·m<sup>-1</sup>·K<sup>-1</sup>, respectively.

Table S2 shows the interfacial energies of the sample pair. The wetting coefficient of PLLA/PCL/MWCNTs composites at both 25 °C and 100 °C are shown in Table S3. All the wetting coefficient values are lower than -1, which means that the MWCNTs are preferably to locate in PLLA phase both at 25 °C and 100 °C.

Table S1 Surface tensions of pure PLLA and pure PCL at 25 °C and 100 °C which extrapolated from values at 25 °C. The surface tensions of MWCNTs were obtained from the reference<sup>S3</sup>.

| Samples       | Total<br>( $\gamma$ ), (mN/m) | dispersive part ( $\gamma^d$ ),<br>(mN/m) | polar part ( $\gamma^p$ ),<br>(mN/m) |
|---------------|-------------------------------|-------------------------------------------|--------------------------------------|
| MWCNTs        | 27.8                          | 17.6                                      | 10.2                                 |
| PLLA (25 °C)  | 43.2                          | 39.2                                      | 3.9                                  |
| PLLA (100 °C) | 38.7                          | 35.2                                      | 3.5                                  |
| PCL(25 °C)    | 38.4                          | 36.5                                      | 1.9                                  |
| PCL(100 °C)   | 34.1                          | 32.4                                      | 1.7                                  |

Table S2 The calculated values of interfacial energies for various sample pairs

| Sample pair                 | Interfacial energies(mN/m) |           |
|-----------------------------|----------------------------|-----------|
|                             | Calculation methods        |           |
|                             | harmonic                   | geometric |
| PLLA (25 °C)/MWCNTs         | 11.1                       | 5.9       |
| PLLA (100 °C) /MWCNTs       | 9.1                        | 4.8       |
| PCL (25 °C)/MWCNTs          | 12.3                       | 6.7       |
| PCL (100 °C) /MWCNTs        | 10.5                       | 5.8       |
| PCL (100 °C)/ PLLA (100 °C) | 0.7                        | 0.4       |
| PCL(25 °C) /PLLA (25 °C)    | 0.8                        | 0.4       |

Table S3 Wetting coefficient evaluated according harmonic mean equation, geometric mean equation

| Materials                         | Wetting coefficient<br>Calculation methods |           |
|-----------------------------------|--------------------------------------------|-----------|
|                                   | harmonic                                   | geometric |
| PLLA (25 °C)/PCL (25 °C)/MWCNTs   | -1.5                                       | -2.0      |
| PLLA (100 °C)/PCL (100 °C)/MWCNTs | -2.0                                       | -2.5      |

In fact, the PCL coated PLLA granules at 100 °C where the PLLA phase is solid. Thus, the MWCNTs can only locate in PCL phase. Because the PCL is completely melted and shows low viscosity at 100 °C. The PCL chains are more readily to diffuse around and into the MWCNTs aggregates compared with that of the PLLA chains at 100 °C and, the MWCNTs are incorporated inside the low viscous PCL phase preferentially and finally trapped inside it. Therefore, the MWCNTs actually located in PCL phase by the kinetic aspects in our case.

## 2. Rheological properties of pure PLLA and pure PCL

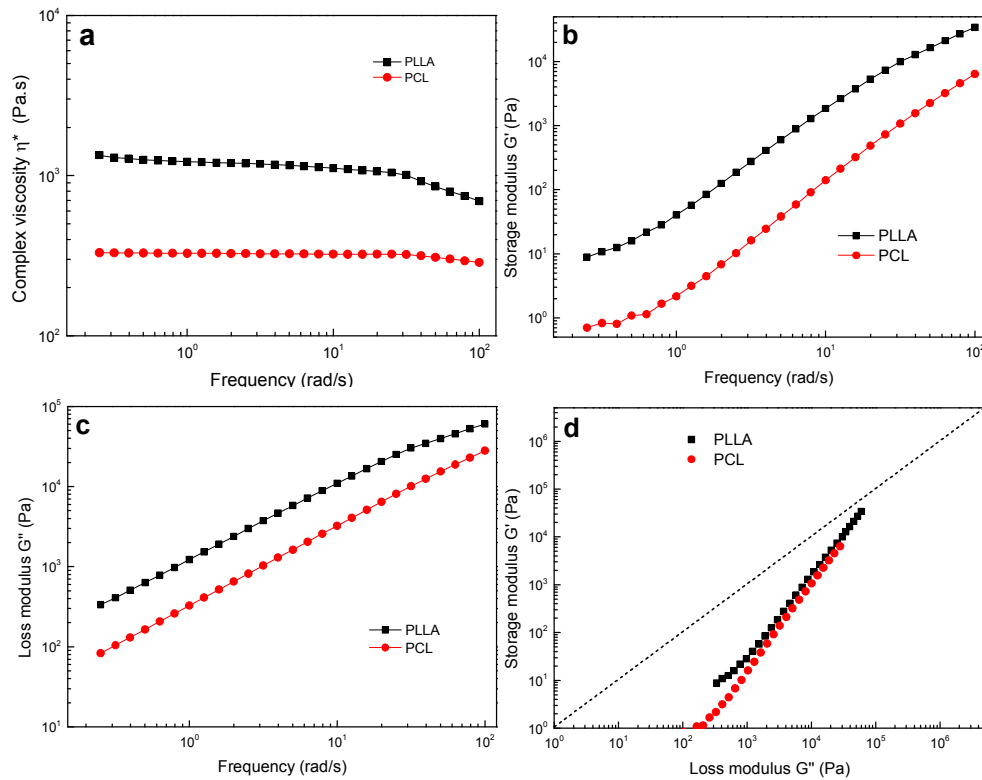

Figure S1 (a) Complex viscosity  $\eta^*$ , (b) storage modulus  $G'$  and (c) loss modulus  $G''$

of the pure PLLA and pure PCL as a function of frequency at 160 °C, (d)  $G'$  as a function of  $G''$  of pure PLLA and pure PCL.

## References

- [S1] Katada, A.; Buys, Y. F.; Tominaga, Y.; Asai, S.; Sumita, M. Relationship between electrical resistivity and particle dispersion state for carbon black filled poly (ethylene-co-vinyl acetate)/poly (L-lactic acid) blend. *Colloid Polym. Sci.* **2005**, *284*, 134-141.
- [S2] Cava, D.; Gavara, R.; Lagaron, J. M.; Voelkel, A. Surface characterization of poly (lactic acid) and polycaprolactone by inverse gas chromatography. *J. Chromatogr. A*, **2007**, *1148*, 86-91.
- [S3] Barber, A. H.; Cohen, S. R.; Wagner, H. D. Static and dynamic wetting measurements of single carbon nanotubes. *Phys. Rev. Lett.* **2004**, *92*, 186103.
